# Supplementary material for: Pelvic Vein Obstruction in Chronic Thromboembolic Pulmonary Hypertension: A Novel Association
Source: MDPI journal article supplement (doi:10.3390/jcm13061553), 2024-03-08
Supplement: s1 [file s1]

Supplemental data

**Supplemental Table S1** - Baseline characteristics of patients that did not undergo invasive venography

| Variable                              | No Venography group    |
|---------------------------------------|------------------------|
|                                       | n (%) or Mean $\pm$ SD |
| Total Population                      | 45                     |
| Age (mean $\pm$ SD, years)            | 59.8 $\pm$ 17.1        |
| Female                                | 27 (60.0%)             |
| Mean BMI (kg/m <sup>2</sup> )         | 31.4 $\pm$ 8.4         |
| Mean BNP (pg/ml)                      | 287.2 $\pm$ 366.4      |
| Hypertension N (%)                    | 20 (44.4%)             |
| Dyslipidemia                          | 11 (24.4%)             |
| Diabetes Mellitus                     | 8 (17.8%)              |
| Smoking history                       | 7 (15.6%)              |
| Hypercoagulable States                | 10 (22.2%)             |
| Lower Extremity DVT                   | 13 (28.9%)             |
| Upper Extremity DVT                   | 2 (4.4%)               |
| Proximal CTEPH                        | 22 (48.9%)             |
| Distal CTEPH                          | 23 (51.1%)             |
| PTE                                   | 32 (71.1%)             |
| BPA                                   | 8 (17.8%)              |
| IVUS                                  | 1 (2.2%)               |
| Inferior Vena Cava (IVC) filter       | 4 (8.9%)               |
| IVC filter at time of Catheterization | 4 (8.9%)               |

BMI – Body Mass Index, BNP – B-type Natriuretic Peptide, BPA – Balloon Pulmonary Angioplasty, CTEPH

– Chronic Thromboembolic Pulmonary Hypertension, DVT – Deep Vein Thrombosis, IVC – Inferior Vena

Cava, IVUS – Intravascular Ultrasound, PTE – Pulmonary Thromboendarterectomy

**Supplemental Table S2** - Hemodynamic data of patients that did not undergo invasive venography

| Variable                                                   | Mean $\pm$ SD      |
|------------------------------------------------------------|--------------------|
| Total population                                           | 45                 |
| Right atrial pressure (mmHg)                               | 10.7 $\pm$ 5.3     |
| Pulmonary artery mean pressure (mmHg)                      | 44.5 $\pm$ 9.8     |
| Pulmonary capillary wedge pressure (mmHg)                  | 12.1 $\pm$ 4.7     |
| Cardiac Output (L/min)                                     | 4.3 $\pm$ 1.1      |
| Cardiac Index (L/min/m <sup>2</sup> )                      | 2.2 $\pm$ 0.5      |
| Systemic vascular resistance (dynes/sec/cm <sup>-5</sup> ) | 1518.3 $\pm$ 599.0 |
| Pulmonary vascular resistance (Wood units)                 | 8.7 $\pm$ 3.8      |
| Fluoroscopy time (minutes)                                 | 15.9 $\pm$ 18.9    |
| Iodinated contrast dose (ml)                               | 151.9 $\pm$ 91.0   |
